# Supplementary material
Source: publisher figshare collection journal article supplement (https://acs.figshare.com/ndownloader/files/4305136)
Supplement: Supplementary file 1 [file 4305136]

 
data_2 
 
_audit_creation_method            SHELXL-97 
_chemical_name_systematic 
; 
 ? 
; 
_chemical_name_common             ? 
_chemical_melting_point           ? 
_chemical_formula_moiety          ? 
_chemical_formula_sum 
 'C32 H50 N2 O4' 
_chemical_formula_weight          526.74 
 
loop_ 
 _atom_type_symbol 
 _atom_type_description 
 _atom_type_scat_dispersion_real 
 _atom_type_scat_dispersion_imag 
 _atom_type_scat_source 
 'C'  'C'   0.0033   0.0016 
 'International Tables Vol C Tables 4.2.6.8 and 6.1.1.4' 
 'H'  'H'   0.0000   0.0000 
 'International Tables Vol C Tables 4.2.6.8 and 6.1.1.4' 
 'N'  'N'   0.0061   0.0033 
 'International Tables Vol C Tables 4.2.6.8 and 6.1.1.4' 
 'O'  'O'   0.0106   0.0060 
 'International Tables Vol C Tables 4.2.6.8 and 6.1.1.4' 
 
_symmetry_cell_setting            Tetragonal 
_symmetry_space_group_name_H-M    P4(3) 
 
loop_ 
 _symmetry_equiv_pos_as_xyz 
 'x, y, z' 
 '-x, -y, z+1/2' 
 '-y, x, z+3/4' 
 'y, -x, z+1/4' 
 
_cell_length_a                    8.2499(9) 
_cell_length_b                    8.2499(9) 
_cell_length_c                    42.596(10) 
_cell_angle_alpha                 90.00 
_cell_angle_beta                  90.00 
_cell_angle_gamma                 90.00 
_cell_volume                      2899.1(8) 
_cell_formula_units_Z             4 
_cell_measurement_temperature     293(2) 
_cell_measurement_reflns_used     2237  
_cell_measurement_theta_min       2.462 
_cell_measurement_theta_max       28.30  
 
_exptl_crystal_description        block 
_exptl_crystal_colour             colourless 
_exptl_crystal_size_max           0.21 
_exptl_crystal_size_mid           0.16 
_exptl_crystal_size_min           0.08 
_exptl_crystal_density_meas       ? 
_exptl_crystal_density_diffrn     1.207 
_exptl_crystal_density_method     'not measured' 
_exptl_crystal_F_000              1152 
_exptl_absorpt_coefficient_mu     0.078 
_exptl_absorpt_correction_type    Multi-scan
_exptl_absorpt_correction_T_min   0.9769 
_exptl_absorpt_correction_T_max   0.9839 
_exptl_absorpt_process_details    Sadabs 
 
_exptl_special_details 
; 
 ? 
; 
 
_diffrn_ambient_temperature       293(2) 
_diffrn_radiation_wavelength      0.71073 
_diffrn_radiation_type            MoK\a 
_diffrn_radiation_source          'fine-focus sealed tube' 
_diffrn_radiation_monochromator   graphite 
_diffrn_measurement_device_type   'CCD area detector'
_diffrn_measurement_method        'phi and omega scans'
_diffrn_detector_area_resol_mean  ? 
_diffrn_standards_number          ? 
_diffrn_standards_interval_count  ? 
_diffrn_standards_interval_time   ? 
_diffrn_standards_decay_%         ? 
_diffrn_reflns_number             18901 
_diffrn_reflns_av_R_equivalents   0.1627 
_diffrn_reflns_av_sigmaI/netI     0.2299 
_diffrn_reflns_limit_h_min        -9 
_diffrn_reflns_limit_h_max        10 
_diffrn_reflns_limit_k_min        -9 
_diffrn_reflns_limit_k_max        10 
_diffrn_reflns_limit_l_min        -55 
_diffrn_reflns_limit_l_max        47 
_diffrn_reflns_theta_min          1.91 
_diffrn_reflns_theta_max          28.30 
_reflns_number_total              6448 
_reflns_number_gt                 2237 
_reflns_threshold_expression      >2sigma(I) 
 
_computing_data_collection        'Bruker apex II'
_computing_cell_refinement        'Bruker apex II' 
_computing_data_reduction         'Bruker SAINT'
_computing_structure_solution     'SHELXS-97 (Sheldrick, 1990)' 
_computing_structure_refinement   'SHELXL-97 (Sheldrick, 1997)' 
_computing_molecular_graphics     'Bruker SHELXTL'
_computing_publication_material   'Bruker SHELXTL' 
 
_refine_special_details 
; 
 Refinement of F^2^ against ALL reflections.  The weighted R-factor wR and 
 goodness of fit S are based on F^2^, conventional R-factors R are based 
 on F, with F set to zero for negative F^2^. The threshold expression of 
 F^2^ > 2sigma(F^2^) is used only for calculating R-factors(gt) etc. and is 
 not relevant to the choice of reflections for refinement.  R-factors based 
 on F^2^ are statistically about twice as large as those based on F, and R- 
 factors based on ALL data will be even larger. 
; 
 
_refine_ls_structure_factor_coef  Fsqd  
_refine_ls_matrix_type            full 
_refine_ls_weighting_scheme       calc  
_refine_ls_weighting_details 
 'calc w=1/[\s^2^(Fo^2^)+(0.0357P)^2^+0.0000P] where P=(Fo^2^+2Fc^2^)/3' 
_atom_sites_solution_primary      direct 
_atom_sites_solution_secondary    difmap 
_atom_sites_solution_hydrogens    geom 
_refine_ls_hydrogen_treatment     mixed 
_refine_ls_extinction_method      SHELXL 
_refine_ls_extinction_coef        0.0058(7) 
_refine_ls_extinction_expression 
 'Fc^*^=kFc[1+0.001xFc^2^\l^3^/sin(2\q)]^-1/4^' 
_refine_ls_abs_structure_details 
 'Flack H D (1983), Acta Cryst. A39, 876-881' 
_refine_ls_abs_structure_Flack    -2(2) 
_refine_ls_number_reflns          6448 
_refine_ls_number_parameters      348 
_refine_ls_number_restraints      1 
_refine_ls_R_factor_all           0.2421 
_refine_ls_R_factor_gt            0.0703 
_refine_ls_wR_factor_ref          0.1577 
_refine_ls_wR_factor_gt           0.1091 
_refine_ls_goodness_of_fit_ref    0.914 
_refine_ls_restrained_S_all       0.914 
_refine_ls_shift/su_max           0.001 
_refine_ls_shift/su_mean          0.000 
 
loop_ 
 _atom_site_label 
 _atom_site_type_symbol 
 _atom_site_fract_x 
 _atom_site_fract_y 
 _atom_site_fract_z 
 _atom_site_U_iso_or_equiv 
 _atom_site_adp_type 
 _atom_site_occupancy 
 _atom_site_symmetry_multiplicity 
 _atom_site_calc_flag 
 _atom_site_refinement_flags 
 _atom_site_disorder_assembly 
 _atom_site_disorder_group 
C1 C 0.7706(8) -0.3676(7) 0.75042(16) 0.0708(19) Uani 1 1 d . . . 
H1A H 0.6827 -0.4208 0.7615 0.085 Uiso 1 1 calc R . . 
H1B H 0.8549 -0.4467 0.7463 0.085 Uiso 1 1 calc R . . 
C2 C 0.7088(8) -0.2936(7) 0.71942(15) 0.078(2) Uani 1 1 d . . . 
H2A H 0.7351 -0.3634 0.7018 0.093 Uiso 1 1 calc R . . 
H2B H 0.5923 -0.2782 0.7201 0.093 Uiso 1 1 calc R . . 
C3 C 0.7966(7) -0.1300(7) 0.71655(14) 0.0618(17) Uani 1 1 d . . . 
H3A H 0.7200 -0.0409 0.7172 0.074 Uiso 1 1 calc R . . 
H3B H 0.8574 -0.1240 0.6971 0.074 Uiso 1 1 calc R . . 
C4 C 0.9118(6) -0.1250(6) 0.74523(12) 0.0409(14) Uani 1 1 d . . . 
C5 C 1.0740(7) -0.2060(6) 0.73917(15) 0.0509(16) Uani 1 1 d . . . 
C6 C 1.2010(7) -0.1402(6) 0.76153(13) 0.0501(15) Uani 1 1 d . . . 
H6A H 1.2929 -0.0969 0.7501 0.060 Uiso 1 1 calc R . . 
H6B H 1.2390 -0.2244 0.7756 0.060 Uiso 1 1 calc R . . 
C7 C 1.1135(6) -0.0052(6) 0.77986(13) 0.0455(15) Uani 1 1 d . . . 
H7 H 1.0720 -0.0525 0.7994 0.055 Uiso 1 1 calc R . . 
C8 C 1.2233(7) 0.1371(7) 0.78861(13) 0.0579(17) Uani 1 1 d . . . 
H8A H 1.1695 0.2018 0.8045 0.069 Uiso 1 1 calc R . . 
H8B H 1.3224 0.0948 0.7977 0.069 Uiso 1 1 calc R . . 
C9 C 0.6973(8) -0.1512(8) 0.78548(15) 0.0709(19) Uani 1 1 d . . . 
H9A H 0.6510 -0.2249 0.8008 0.085 Uiso 1 1 calc R . . 
H9B H 0.6140 -0.1253 0.7702 0.085 Uiso 1 1 calc R . . 
C10 C 0.7503(7) 0.0007(7) 0.80162(14) 0.0654(19) Uani 1 1 d . . . 
H10A H 0.8283 -0.0256 0.8179 0.078 Uiso 1 1 calc R . . 
H10B H 0.6576 0.0520 0.8115 0.078 Uiso 1 1 calc R . . 
C11 C 0.8274(7) 0.1186(7) 0.77803(14) 0.0595(17) Uani 1 1 d . . . 
H11A H 0.7444 0.1574 0.7638 0.071 Uiso 1 1 calc R . . 
H11B H 0.8701 0.2115 0.7893 0.071 Uiso 1 1 calc R . . 
C12 C 0.9646(6) 0.0404(6) 0.75890(12) 0.0360(13) Uani 1 1 d . . . 
C13 C 1.0142(7) 0.1577(6) 0.73330(13) 0.0494(15) Uani 1 1 d . . . 
H13 H 0.9157 0.1997 0.7233 0.059 Uiso 1 1 calc R . . 
C14 C 1.1117(7) 0.3000(7) 0.74537(14) 0.0604(17) Uani 1 1 d . . . 
H14A H 1.0468 0.3607 0.7603 0.072 Uiso 1 1 calc R . . 
H14B H 1.1375 0.3715 0.7280 0.072 Uiso 1 1 calc R . . 
C15 C 1.2672(7) 0.2462(7) 0.76108(14) 0.0541(16) Uani 1 1 d . . . 
H15 H 1.3304 0.1828 0.7460 0.065 Uiso 1 1 calc R . . 
C16 C 1.3697(8) 0.3919(7) 0.77160(16) 0.084(2) Uani 1 1 d . . . 
H16A H 1.3139 0.4492 0.7880 0.126 Uiso 1 1 calc R . . 
H16B H 1.3869 0.4631 0.7541 0.126 Uiso 1 1 calc R . . 
H16C H 1.4723 0.3543 0.7793 0.126 Uiso 1 1 calc R . . 
C17 C 0.0459(8) 0.3726(7) 0.65397(14) 0.0641(18) Uani 1 1 d . . . 
H17A H 0.0407 0.4662 0.6677 0.077 Uiso 1 1 calc R . . 
H17B H -0.0503 0.3071 0.6571 0.077 Uiso 1 1 calc R . . 
C18 C 0.0611(8) 0.4255(7) 0.61938(14) 0.074(2) Uani 1 1 d . . . 
H18A H -0.0429 0.4170 0.6089 0.089 Uiso 1 1 calc R . . 
H18B H 0.0979 0.5370 0.6181 0.089 Uiso 1 1 calc R . . 
C19 C 0.1850(7) 0.3112(7) 0.60406(14) 0.0651(18) Uani 1 1 d . . . 
H19A H 0.2816 0.3698 0.5978 0.078 Uiso 1 1 calc R . . 
H19B H 0.1390 0.2580 0.5858 0.078 Uiso 1 1 calc R . . 
C20 C 0.2242(7) 0.1875(6) 0.63001(13) 0.0452(14) Uani 1 1 d . . . 
C21 C 0.1052(7) 0.0445(7) 0.63143(14) 0.0496(15) Uani 1 1 d . . . 
C22 C 0.1892(6) -0.1023(6) 0.64460(13) 0.0468(14) Uani 1 1 d . . . 
H22A H 0.1871 -0.1909 0.6296 0.056 Uiso 1 1 calc R . . 
H22B H 0.1371 -0.1377 0.6638 0.056 Uiso 1 1 calc R . . 
C23 C 0.3635(6) -0.0482(6) 0.65100(12) 0.0387(13) Uani 1 1 d . . . 
H23 H 0.3668 -0.0089 0.6727 0.046 Uiso 1 1 calc R . . 
C24 C 0.4942(6) -0.1760(6) 0.64800(14) 0.0552(16) Uani 1 1 d . . . 
H24A H 0.4625 -0.2700 0.6602 0.066 Uiso 1 1 calc R . . 
H24B H 0.5936 -0.1338 0.6570 0.066 Uiso 1 1 calc R . . 
C25 C 0.3327(8) 0.3870(6) 0.66743(15) 0.0603(17) Uani 1 1 d . . . 
H25A H 0.3097 0.4448 0.6868 0.072 Uiso 1 1 calc R . . 
H25B H 0.3433 0.4661 0.6507 0.072 Uiso 1 1 calc R . . 
C26 C 0.4889(7) 0.2947(7) 0.67084(15) 0.0681(19) Uani 1 1 d . . . 
H26A H 0.4787 0.2163 0.6877 0.082 Uiso 1 1 calc R . . 
H26B H 0.5756 0.3691 0.6762 0.082 Uiso 1 1 calc R . . 
C27 C 0.5307(6) 0.2074(6) 0.64046(15) 0.0573(16) Uani 1 1 d . . . 
H27A H 0.5554 0.2867 0.6243 0.069 Uiso 1 1 calc R . . 
H27B H 0.6264 0.1412 0.6437 0.069 Uiso 1 1 calc R . . 
C28 C 0.3922(6) 0.1009(6) 0.62946(12) 0.0389(13) Uani 1 1 d . . . 
C29 C 0.4294(6) 0.0439(7) 0.59553(13) 0.0504(16) Uani 1 1 d . . . 
H29 H 0.4623 0.1383 0.5831 0.060 Uiso 1 1 calc R . . 
C30 C 0.5643(6) -0.0827(7) 0.59393(14) 0.0554(16) Uani 1 1 d . . . 
H30A H 0.5778 -0.1174 0.5723 0.066 Uiso 1 1 calc R . . 
H30B H 0.6653 -0.0337 0.6007 0.066 Uiso 1 1 calc R . . 
C31 C 0.5291(6) -0.2305(6) 0.61436(14) 0.0513(16) Uani 1 1 d . . . 
H31 H 0.4326 -0.2851 0.6061 0.062 Uiso 1 1 calc R . . 
C32 C 0.6721(7) -0.3499(7) 0.61314(17) 0.084(2) Uani 1 1 d . . . 
H32A H 0.6867 -0.3872 0.5920 0.126 Uiso 1 1 calc R . . 
H32B H 0.6499 -0.4407 0.6266 0.126 Uiso 1 1 calc R . . 
H32C H 0.7689 -0.2964 0.6201 0.126 Uiso 1 1 calc R . . 
N1 N 0.8355(5) -0.2320(5) 0.76935(11) 0.0486(12) Uani 1 1 d . . . 
N2 N 0.1971(5) 0.2750(5) 0.66021(10) 0.0457(12) Uani 1 1 d . . . 
O1 O 1.1053(5) 0.0711(4) 0.71018(9) 0.0591(11) Uani 1 1 d . . . 
H1 H 1.1390 0.1347 0.6969 0.089 Uiso 1 1 calc R . . 
O2 O 1.1010(5) -0.3101(4) 0.71933(10) 0.0685(13) Uani 1 1 d . . . 
O3 O 0.2842(4) -0.0224(5) 0.58204(9) 0.0628(12) Uani 1 1 d . . . 
H3 H 0.3036 -0.0556 0.5643 0.094 Uiso 1 1 calc R . . 
O4 O -0.0358(5) 0.0494(5) 0.62363(11) 0.0757(14) Uani 1 1 d . . . 
 
loop_ 
 _atom_site_aniso_label 
 _atom_site_aniso_U_11 
 _atom_site_aniso_U_22 
 _atom_site_aniso_U_33 
 _atom_site_aniso_U_23 
 _atom_site_aniso_U_13 
 _atom_site_aniso_U_12 
C1 0.084(5) 0.062(4) 0.066(5) 0.007(4) -0.018(4) -0.012(4) 
C2 0.090(5) 0.077(5) 0.066(5) 0.014(4) -0.024(4) -0.017(4) 
C3 0.076(4) 0.058(4) 0.051(4) 0.002(3) -0.015(4) -0.001(3) 
C4 0.047(4) 0.039(3) 0.037(4) -0.002(3) 0.001(3) -0.002(3) 
C5 0.064(4) 0.028(3) 0.061(5) 0.005(3) -0.001(4) 0.005(3) 
C6 0.052(4) 0.046(3) 0.052(4) 0.012(3) 0.002(3) -0.002(3) 
C7 0.044(4) 0.046(3) 0.046(4) 0.002(3) 0.000(3) 0.001(3) 
C8 0.062(4) 0.060(4) 0.053(4) 0.007(3) 0.002(3) -0.013(3) 
C9 0.059(4) 0.092(5) 0.062(5) 0.009(4) 0.002(4) -0.006(4) 
C10 0.056(4) 0.088(5) 0.052(5) 0.001(4) 0.017(3) 0.005(4) 
C11 0.059(4) 0.064(4) 0.056(4) 0.000(3) 0.006(3) 0.006(3) 
C12 0.036(3) 0.037(3) 0.035(3) 0.001(3) 0.007(3) 0.004(2) 
C13 0.060(4) 0.046(4) 0.042(4) -0.003(3) 0.007(3) 0.017(3) 
C14 0.079(5) 0.052(4) 0.050(4) 0.000(3) 0.012(4) -0.004(3) 
C15 0.054(4) 0.053(4) 0.055(4) -0.009(3) 0.010(3) -0.015(3) 
C16 0.089(5) 0.078(5) 0.085(6) -0.005(4) 0.004(4) -0.027(4) 
C17 0.085(5) 0.056(4) 0.052(5) 0.001(3) 0.009(4) 0.027(4) 
C18 0.099(5) 0.069(4) 0.055(5) 0.007(4) -0.009(4) 0.026(4) 
C19 0.079(5) 0.066(4) 0.051(4) -0.003(4) -0.006(4) 0.016(4) 
C20 0.056(4) 0.042(3) 0.037(4) 0.003(3) 0.000(3) 0.003(3) 
C21 0.047(4) 0.059(4) 0.043(4) -0.010(3) 0.006(3) 0.003(3) 
C22 0.057(4) 0.044(3) 0.040(4) -0.007(3) 0.004(3) -0.005(3) 
C23 0.044(3) 0.040(3) 0.032(3) 0.000(3) -0.001(3) -0.005(3) 
C24 0.056(4) 0.057(4) 0.053(4) 0.004(3) 0.001(3) -0.001(3) 
C25 0.084(5) 0.049(4) 0.049(4) -0.004(3) 0.007(4) -0.011(4) 
C26 0.076(5) 0.061(4) 0.067(5) -0.010(4) -0.016(4) -0.024(4) 
C27 0.054(4) 0.048(4) 0.069(5) 0.003(3) -0.001(3) -0.018(3) 
C28 0.039(3) 0.041(3) 0.036(4) -0.002(3) 0.001(3) -0.011(3) 
C29 0.051(4) 0.056(4) 0.044(4) -0.003(3) 0.007(3) -0.002(3) 
C30 0.047(4) 0.066(4) 0.053(4) -0.008(3) 0.009(3) 0.007(3) 
C31 0.043(4) 0.046(4) 0.066(5) -0.009(3) 0.007(3) 0.002(3) 
C32 0.074(5) 0.060(4) 0.118(6) 0.002(4) 0.012(4) 0.021(4) 
N1 0.046(3) 0.051(3) 0.049(3) 0.012(3) -0.002(2) -0.007(2) 
N2 0.055(3) 0.042(3) 0.040(3) -0.004(2) 0.006(2) -0.011(2) 
O1 0.095(3) 0.043(2) 0.040(3) 0.001(2) 0.022(2) 0.001(2) 
O2 0.084(3) 0.048(3) 0.073(3) -0.007(2) 0.011(3) 0.005(2) 
O3 0.059(3) 0.088(3) 0.042(3) -0.011(2) -0.002(2) 0.009(2) 
O4 0.049(3) 0.087(3) 0.092(4) -0.021(3) -0.012(2) 0.006(2) 
 
_geom_special_details 
; 
 All esds (except the esd in the dihedral angle between two l.s. planes) 
 are estimated using the full covariance matrix.  The cell esds are taken 
 into account individually in the estimation of esds in distances, angles 
 and torsion angles; correlations between esds in cell parameters are only 
 used when they are defined by crystal symmetry.  An approximate (isotropic) 
 treatment of cell esds is used for estimating esds involving l.s. planes. 
; 
 
loop_ 
 _geom_bond_atom_site_label_1 
 _geom_bond_atom_site_label_2 
 _geom_bond_distance 
 _geom_bond_site_symmetry_2 
 _geom_bond_publ_flag 
C1 N1 1.479(6) . ? 
C1 C2 1.541(8) . ? 
C1 H1A 0.9700 . ? 
C1 H1B 0.9700 . ? 
C2 C3 1.537(7) . ? 
C2 H2A 0.9700 . ? 
C2 H2B 0.9700 . ? 
C3 C4 1.548(7) . ? 
C3 H3A 0.9700 . ? 
C3 H3B 0.9700 . ? 
C4 N1 1.494(6) . ? 
C4 C5 1.518(7) . ? 
C4 C12 1.546(6) . ? 
C5 O2 1.225(6) . ? 
C5 C6 1.517(7) . ? 
C6 C7 1.540(6) . ? 
C6 H6A 0.9700 . ? 
C6 H6B 0.9700 . ? 
C7 C8 1.529(7) . ? 
C7 C12 1.564(7) . ? 
C7 H7 0.9800 . ? 
C8 C15 1.522(7) . ? 
C8 H8A 0.9700 . ? 
C8 H8B 0.9700 . ? 
C9 N1 1.488(7) . ? 
C9 C10 1.495(8) . ? 
C9 H9A 0.9700 . ? 
C9 H9B 0.9700 . ? 
C10 C11 1.537(7) . ? 
C10 H10A 0.9700 . ? 
C10 H10B 0.9700 . ? 
C11 C12 1.536(7) . ? 
C11 H11A 0.9700 . ? 
C11 H11B 0.9700 . ? 
C12 C13 1.514(7) . ? 
C13 O1 1.430(6) . ? 
C13 C14 1.513(7) . ? 
C13 H13 0.9800 . ? 
C14 C15 1.513(8) . ? 
C14 H14A 0.9700 . ? 
C14 H14B 0.9700 . ? 
C15 C16 1.536(7) . ? 
C15 H15 0.9800 . ? 
C16 H16A 0.9600 . ? 
C16 H16B 0.9600 . ? 
C16 H16C 0.9600 . ? 
C17 N2 1.508(6) . ? 
C17 C18 1.542(8) . ? 
C17 H17A 0.9700 . ? 
C17 H17B 0.9700 . ? 
C18 C19 1.537(7) . ? 
C18 H18A 0.9700 . ? 
C18 H18B 0.9700 . ? 
C19 C20 1.538(7) . ? 
C19 H19A 0.9700 . ? 
C19 H19B 0.9700 . ? 
C20 N2 1.492(6) . ? 
C20 C21 1.536(7) . ? 
C20 C28 1.560(7) . ? 
C21 O4 1.210(6) . ? 
C21 C22 1.505(7) . ? 
C22 C23 1.531(6) . ? 
C22 H22A 0.9700 . ? 
C22 H22B 0.9700 . ? 
C23 C24 1.513(7) . ? 
C23 C28 1.553(6) . ? 
C23 H23 0.9800 . ? 
C24 C31 1.529(7) . ? 
C24 H24A 0.9700 . ? 
C24 H24B 0.9700 . ? 
C25 N2 1.483(6) . ? 
C25 C26 1.504(7) . ? 
C25 H25A 0.9700 . ? 
C25 H25B 0.9700 . ? 
C26 C27 1.521(8) . ? 
C26 H26A 0.9700 . ? 
C26 H26B 0.9700 . ? 
C27 C28 1.515(6) . ? 
C27 H27A 0.9700 . ? 
C27 H27B 0.9700 . ? 
C28 C29 1.550(7) . ? 
C29 O3 1.436(6) . ? 
C29 C30 1.528(6) . ? 
C29 H29 0.9800 . ? 
C30 C31 1.526(7) . ? 
C30 H30A 0.9700 . ? 
C30 H30B 0.9700 . ? 
C31 C32 1.537(7) . ? 
C31 H31 0.9800 . ? 
C32 H32A 0.9600 . ? 
C32 H32B 0.9600 . ? 
C32 H32C 0.9600 . ? 
O1 H1 0.8200 . ? 
O3 H3 0.8200 . ? 
 
loop_ 
 _geom_angle_atom_site_label_1 
 _geom_angle_atom_site_label_2 
 _geom_angle_atom_site_label_3 
 _geom_angle 
 _geom_angle_site_symmetry_1 
 _geom_angle_site_symmetry_3 
 _geom_angle_publ_flag 
N1 C1 C2 106.7(5) . . ? 
N1 C1 H1A 110.4 . . ? 
C2 C1 H1A 110.4 . . ? 
N1 C1 H1B 110.4 . . ? 
C2 C1 H1B 110.4 . . ? 
H1A C1 H1B 108.6 . . ? 
C3 C2 C1 105.1(5) . . ? 
C3 C2 H2A 110.7 . . ? 
C1 C2 H2A 110.7 . . ? 
C3 C2 H2B 110.7 . . ? 
C1 C2 H2B 110.7 . . ? 
H2A C2 H2B 108.8 . . ? 
C2 C3 C4 104.5(4) . . ? 
C2 C3 H3A 110.9 . . ? 
C4 C3 H3A 110.9 . . ? 
C2 C3 H3B 110.9 . . ? 
C4 C3 H3B 110.9 . . ? 
H3A C3 H3B 108.9 . . ? 
N1 C4 C5 103.2(4) . . ? 
N1 C4 C12 112.4(4) . . ? 
C5 C4 C12 101.8(4) . . ? 
N1 C4 C3 105.6(4) . . ? 
C5 C4 C3 113.3(5) . . ? 
C12 C4 C3 119.6(4) . . ? 
O2 C5 C6 123.9(5) . . ? 
O2 C5 C4 125.9(6) . . ? 
C6 C5 C4 110.2(5) . . ? 
C5 C6 C7 104.7(5) . . ? 
C5 C6 H6A 110.8 . . ? 
C7 C6 H6A 110.8 . . ? 
C5 C6 H6B 110.8 . . ? 
C7 C6 H6B 110.8 . . ? 
H6A C6 H6B 108.9 . . ? 
C8 C7 C6 113.6(4) . . ? 
C8 C7 C12 114.8(4) . . ? 
C6 C7 C12 104.7(4) . . ? 
C8 C7 H7 107.8 . . ? 
C6 C7 H7 107.8 . . ? 
C12 C7 H7 107.8 . . ? 
C15 C8 C7 114.0(5) . . ? 
C15 C8 H8A 108.7 . . ? 
C7 C8 H8A 108.7 . . ? 
C15 C8 H8B 108.7 . . ? 
C7 C8 H8B 108.7 . . ? 
H8A C8 H8B 107.6 . . ? 
N1 C9 C10 111.3(5) . . ? 
N1 C9 H9A 109.4 . . ? 
C10 C9 H9A 109.4 . . ? 
N1 C9 H9B 109.4 . . ? 
C10 C9 H9B 109.4 . . ? 
H9A C9 H9B 108.0 . . ? 
C9 C10 C11 110.5(5) . . ? 
C9 C10 H10A 109.5 . . ? 
C11 C10 H10A 109.5 . . ? 
C9 C10 H10B 109.5 . . ? 
C11 C10 H10B 109.5 . . ? 
H10A C10 H10B 108.1 . . ? 
C12 C11 C10 112.7(5) . . ? 
C12 C11 H11A 109.1 . . ? 
C10 C11 H11A 109.1 . . ? 
C12 C11 H11B 109.1 . . ? 
C10 C11 H11B 109.1 . . ? 
H11A C11 H11B 107.8 . . ? 
C13 C12 C11 108.2(4) . . ? 
C13 C12 C4 111.7(4) . . ? 
C11 C12 C4 111.3(4) . . ? 
C13 C12 C7 110.7(5) . . ? 
C11 C12 C7 112.1(5) . . ? 
C4 C12 C7 102.9(4) . . ? 
O1 C13 C14 110.0(5) . . ? 
O1 C13 C12 108.6(4) . . ? 
C14 C13 C12 113.2(5) . . ? 
O1 C13 H13 108.3 . . ? 
C14 C13 H13 108.3 . . ? 
C12 C13 H13 108.3 . . ? 
C13 C14 C15 111.9(5) . . ? 
C13 C14 H14A 109.2 . . ? 
C15 C14 H14A 109.2 . . ? 
C13 C14 H14B 109.2 . . ? 
C15 C14 H14B 109.2 . . ? 
H14A C14 H14B 107.9 . . ? 
C14 C15 C8 108.2(5) . . ? 
C14 C15 C16 111.5(5) . . ? 
C8 C15 C16 111.7(5) . . ? 
C14 C15 H15 108.5 . . ? 
C8 C15 H15 108.5 . . ? 
C16 C15 H15 108.5 . . ? 
C15 C16 H16A 109.5 . . ? 
C15 C16 H16B 109.5 . . ? 
H16A C16 H16B 109.5 . . ? 
C15 C16 H16C 109.5 . . ? 
H16A C16 H16C 109.5 . . ? 
H16B C16 H16C 109.5 . . ? 
N2 C17 C18 104.6(5) . . ? 
N2 C17 H17A 110.8 . . ? 
C18 C17 H17A 110.8 . . ? 
N2 C17 H17B 110.8 . . ? 
C18 C17 H17B 110.8 . . ? 
H17A C17 H17B 108.9 . . ? 
C19 C18 C17 106.6(5) . . ? 
C19 C18 H18A 110.4 . . ? 
C17 C18 H18A 110.4 . . ? 
C19 C18 H18B 110.4 . . ? 
C17 C18 H18B 110.4 . . ? 
H18A C18 H18B 108.6 . . ? 
C18 C19 C20 104.0(5) . . ? 
C18 C19 H19A 111.0 . . ? 
C20 C19 H19A 111.0 . . ? 
C18 C19 H19B 111.0 . . ? 
C20 C19 H19B 111.0 . . ? 
H19A C19 H19B 109.0 . . ? 
N2 C20 C21 104.0(4) . . ? 
N2 C20 C19 105.5(4) . . ? 
C21 C20 C19 113.8(5) . . ? 
N2 C20 C28 111.6(4) . . ? 
C21 C20 C28 102.5(4) . . ? 
C19 C20 C28 118.7(5) . . ? 
O4 C21 C22 124.9(5) . . ? 
O4 C21 C20 125.3(5) . . ? 
C22 C21 C20 109.8(5) . . ? 
C21 C22 C23 105.3(4) . . ? 
C21 C22 H22A 110.7 . . ? 
C23 C22 H22A 110.7 . . ? 
C21 C22 H22B 110.7 . . ? 
C23 C22 H22B 110.7 . . ? 
H22A C22 H22B 108.8 . . ? 
C24 C23 C22 116.8(4) . . ? 
C24 C23 C28 113.2(4) . . ? 
C22 C23 C28 105.6(4) . . ? 
C24 C23 H23 106.9 . . ? 
C22 C23 H23 106.9 . . ? 
C28 C23 H23 106.9 . . ? 
C23 C24 C31 114.7(4) . . ? 
C23 C24 H24A 108.6 . . ? 
C31 C24 H24A 108.6 . . ? 
C23 C24 H24B 108.6 . . ? 
C31 C24 H24B 108.6 . . ? 
H24A C24 H24B 107.6 . . ? 
N2 C25 C26 110.5(4) . . ? 
N2 C25 H25A 109.5 . . ? 
C26 C25 H25A 109.5 . . ? 
N2 C25 H25B 109.5 . . ? 
C26 C25 H25B 109.5 . . ? 
H25A C25 H25B 108.1 . . ? 
C25 C26 C27 110.6(5) . . ? 
C25 C26 H26A 109.5 . . ? 
C27 C26 H26A 109.5 . . ? 
C25 C26 H26B 109.5 . . ? 
C27 C26 H26B 109.5 . . ? 
H26A C26 H26B 108.1 . . ? 
C28 C27 C26 111.5(5) . . ? 
C28 C27 H27A 109.3 . . ? 
C26 C27 H27A 109.3 . . ? 
C28 C27 H27B 109.3 . . ? 
C26 C27 H27B 109.3 . . ? 
H27A C27 H27B 108.0 . . ? 
C27 C28 C29 108.4(4) . . ? 
C27 C28 C23 113.1(4) . . ? 
C29 C28 C23 109.9(4) . . ? 
C27 C28 C20 113.5(4) . . ? 
C29 C28 C20 109.2(4) . . ? 
C23 C28 C20 102.6(4) . . ? 
O3 C29 C30 109.2(4) . . ? 
O3 C29 C28 108.9(4) . . ? 
C30 C29 C28 113.1(5) . . ? 
O3 C29 H29 108.5 . . ? 
C30 C29 H29 108.5 . . ? 
C28 C29 H29 108.5 . . ? 
C31 C30 C29 112.5(4) . . ? 
C31 C30 H30A 109.1 . . ? 
C29 C30 H30A 109.1 . . ? 
C31 C30 H30B 109.1 . . ? 
C29 C30 H30B 109.1 . . ? 
H30A C30 H30B 107.8 . . ? 
C30 C31 C24 109.6(4) . . ? 
C30 C31 C32 110.3(5) . . ? 
C24 C31 C32 111.4(5) . . ? 
C30 C31 H31 108.5 . . ? 
C24 C31 H31 108.5 . . ? 
C32 C31 H31 108.5 . . ? 
C31 C32 H32A 109.5 . . ? 
C31 C32 H32B 109.5 . . ? 
H32A C32 H32B 109.5 . . ? 
C31 C32 H32C 109.5 . . ? 
H32A C32 H32C 109.5 . . ? 
H32B C32 H32C 109.5 . . ? 
C1 N1 C9 108.2(5) . . ? 
C1 N1 C4 103.0(4) . . ? 
C9 N1 C4 112.1(4) . . ? 
C25 N2 C20 111.6(4) . . ? 
C25 N2 C17 109.1(4) . . ? 
C20 N2 C17 103.3(4) . . ? 
C13 O1 H1 109.5 . . ? 
C29 O3 H3 109.5 . . ? 
 
_diffrn_measured_fraction_theta_max    0.976 
_diffrn_reflns_theta_full              28.30 
_diffrn_measured_fraction_theta_full   0.976 
_refine_diff_density_max    0.183 
_refine_diff_density_min   -0.176 
_refine_diff_density_rms    0.046 
